# Supplementary material
Source: PubMed Central journal article supplement (PMC2945885)

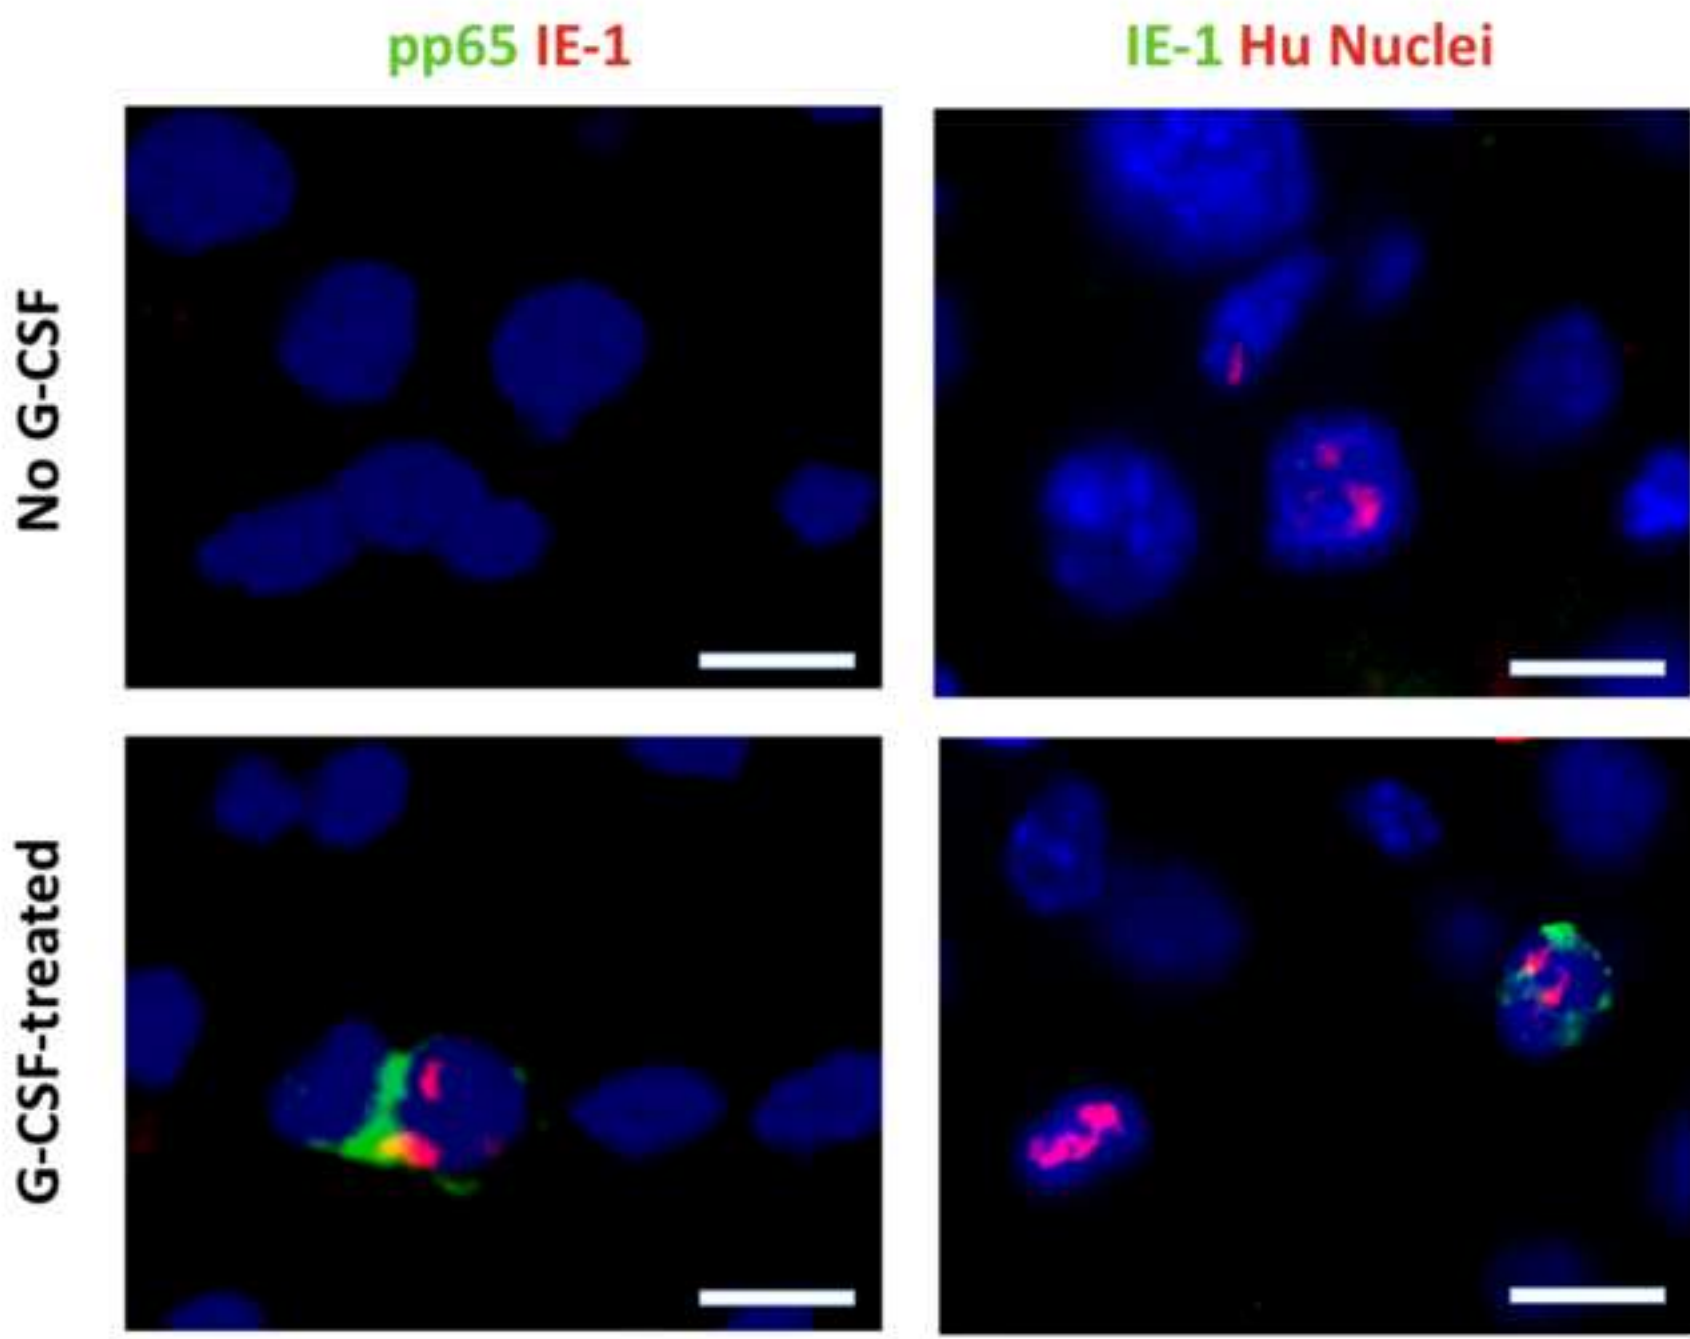

Supplement: NIHMS229879-supplement-01.pdf [file NIHMS229879-supplement-01.pdf]
